# Supplementary material for: Genetic and pharmacological interventions in the aging motor nervous system slow motor aging and extend life span in C. elegans
Source: PubMed Central journal article supplement — Sci Adv. 2019 Jan 2;5(1):eaau5041. doi: 10.1126/sciadv.aau5041 (PMC6314820; doi:10.1126/sciadv.aau5041), 2019-01-02
Supplement: aau5041_SM.pdf [file aau5041_SM.pdf]

## Supplementary Materials for

### Genetic and pharmacological interventions in the aging motor nervous system slow motor aging and extend life span in *C. elegans*

Guang Li, Jianke Gong, Jie Liu, Jinzhi Liu, Huahua Li, Ao-Lin Hsu, Jianfeng Liu\*, X.Z. Shawn Xu\*

\*Corresponding author. Email: jfliu@hust.edu.cn (J.L.); shawnxu@umich.edu (X.Z.S.X.)

Published 2 January 2019, *Sci. Adv.* **5**, eaau5041 (2019)

DOI: 10.1126/sciadv.aau5041

#### This PDF file includes:

- Fig. S1. *slo-1* mutant worms exhibit slower locomotor activity decline throughout life span.
- Fig. S2. *slo-1* gain-of-function mutation greatly shortens life span.
- Fig. S3. DAF-16 target gene expression and DAF-16 nuclear translocation in *slo-1* mutant worms.
- Fig. S4. *slo-1* and IIS act in parallel to regulate life span.
- Fig. S5. Expression of *daf-16* cDNA in the muscle fails to rescue the *daf-16* mutant phenotype.
- Fig. S6. The effects of different concentrations of paxilline on life span and motor aging.
- Fig. S7. Loss of *slo-1* does not extend the life span of mutants defective in neurotransmission.
- Table S1. Summary of life-span data.

## Figure S1

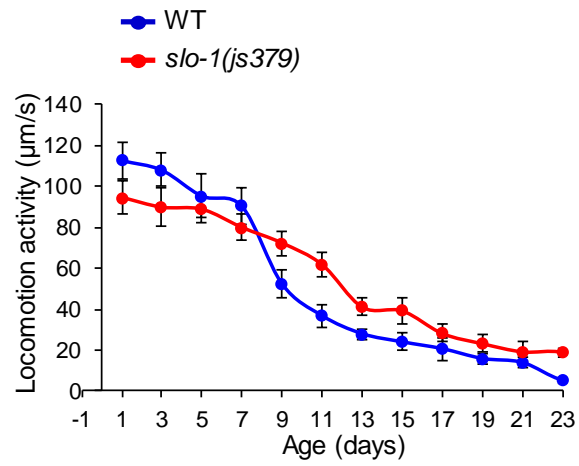

**Fig. S1. *slo-1* mutant worms exhibit slower locomotor activity decline throughout life span.** The experiments were done as described in Figure 1 except that worms were analyzed for locomotion throughout the entire lifespan. Error bars: SEM.  $n \geq 20$ .

## Figure S2

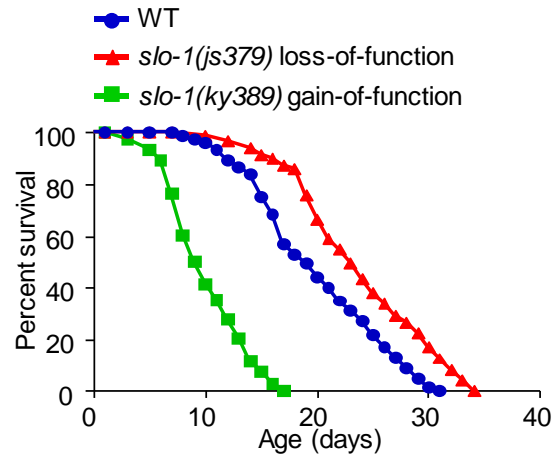

**Fig. S2. *slo-1* gain-of-function mutation greatly shortens life span. *slo-1(ky389)* mutation greatly shortens lifespan ( $p < 0.0001$ , Log Rank test).**

## Figure S3

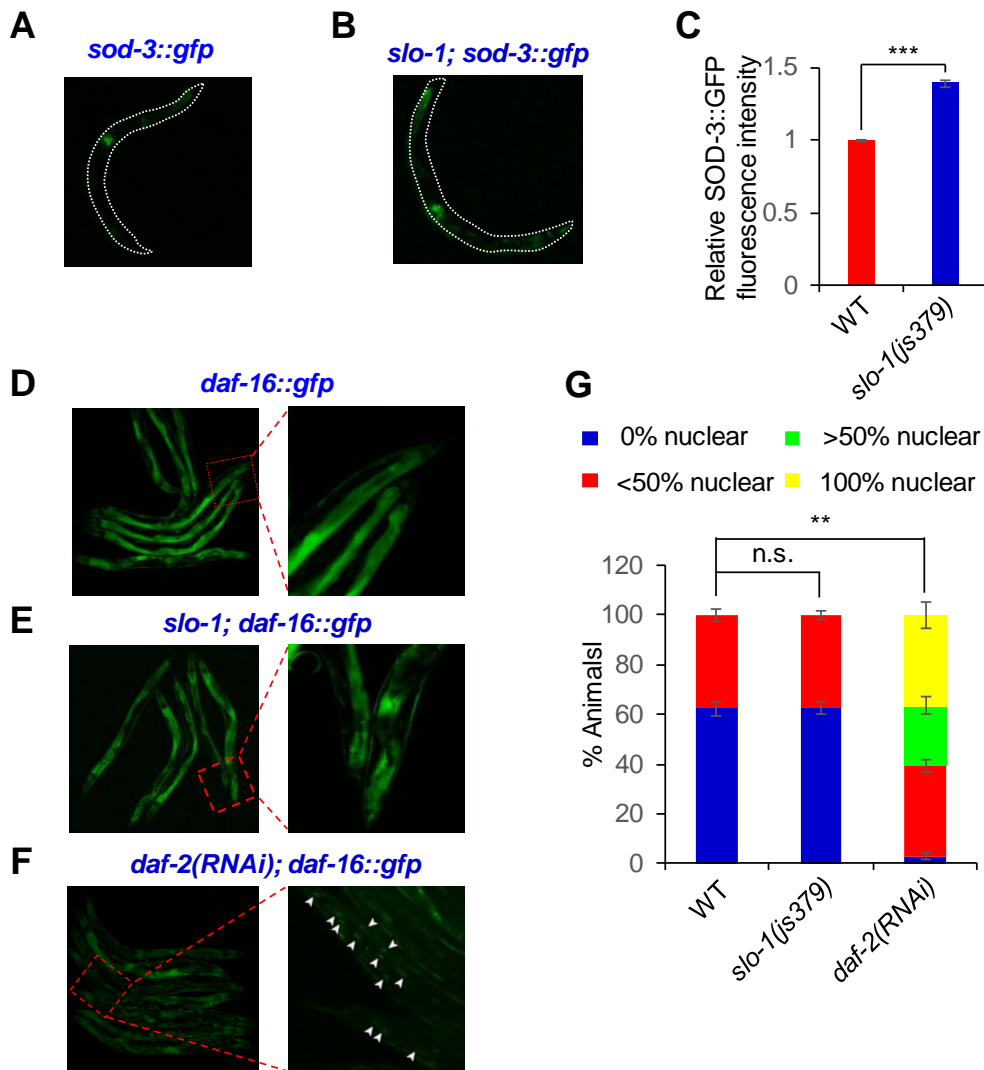

### Fig. S3. DAF-16 target gene expression and DAF-16 nuclear translocation in *slo-1* mutant worms.

(A-C) the DAF-16 target gene *sod-3* is upregulated in *slo-1(js379)* mutant worms. Shown in (A) and (B) are representative images of worms expressing a transgene expressing SOD-3::GFP. The dotted lines in white drawn around the worm denote the boundary of the worm. Data in (A) and (B) are summarized in (C). Error bars: SEM. \*\*\* $p < 0.00001$  (t test).  $n \geq 20$

(D-G) DAF-16 subcellular localization is not affected in *slo-1* mutant worms. Shown in (D-F) are sample images of worms carrying a *daf-16::gfp* transgene. Shown to the right are zoom-in images. (G) bar graph summarizing the data in (D-F). No notable difference was observed between WT and *slo-1(js379)* mutant worms in DAF-16::GFP nuclear localization pattern. *daf-2(RNAi)* serves as a control. Arrow heads in (F) point to nuclei. Error bars: SEM. \*\* $p < 0.001$ .  $n \geq 25$ .

## Figure S4

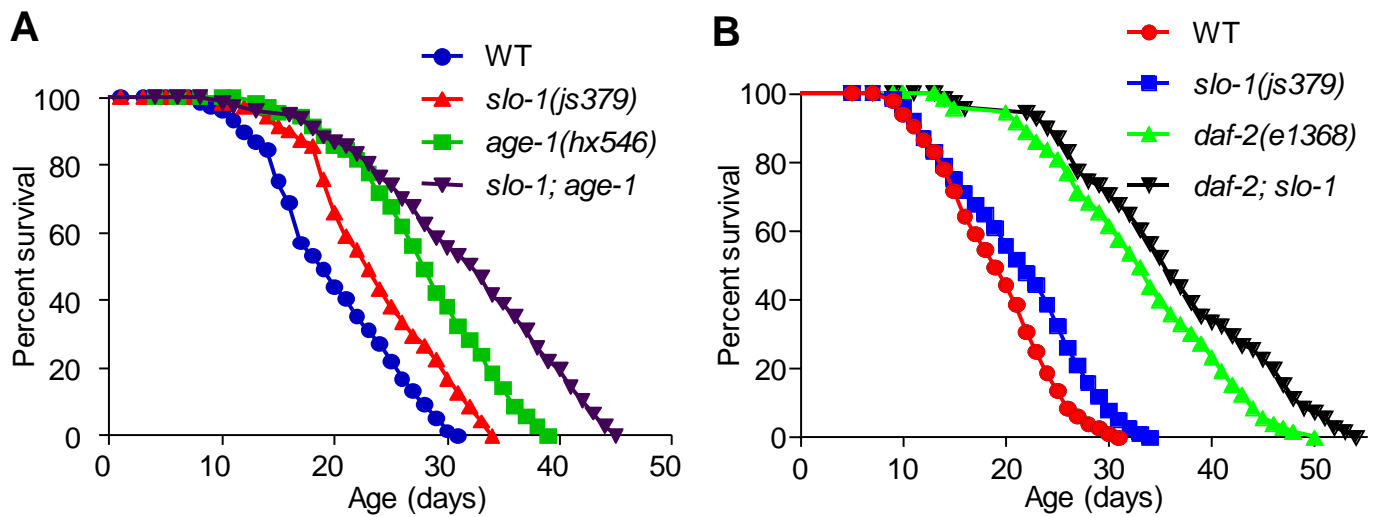

**Fig. S4. *slo-1* and IIS act in parallel to regulate life span.** *slo-1* mutation can further extend the lifespan of mutants defective in insulin/IGF-1 signaling, such as *age-1(hx546)* (A) ( $p < 0.001$ , Log Rank test), and *daf-2(e1368)* mutants (B) ( $p < 0.005$ , Long Rank test). Fig. S4A and Fig. S2 were performed at the same time and share the same WT and *slo-1* lifespan curves.

## Figure S5

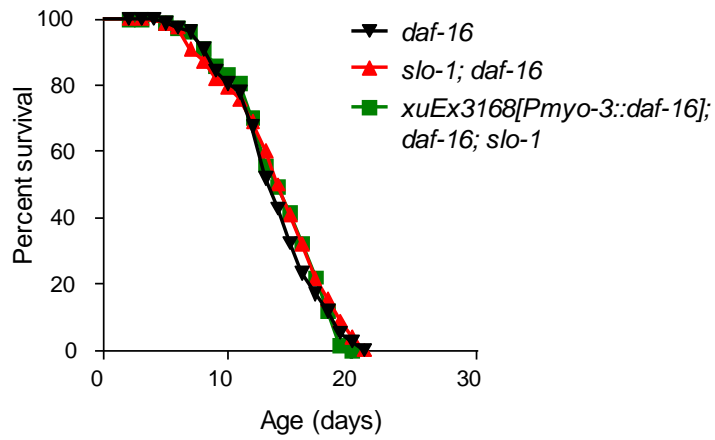

**Fig. S5. Expression of *daf-16* cDNA in the muscle fails to rescue the *daf-16* mutant phenotype.** Loss of *daf-16* suppressed the long-lived phenotype of *slo-1* worms (see Figure 4A-B). Expression of *daf-16* cDNA in the muscle using *myo-3* promoter cannot rescue the *daf-16* phenotype ( $p=0.843$ , Log Rank test).

## Figure S6

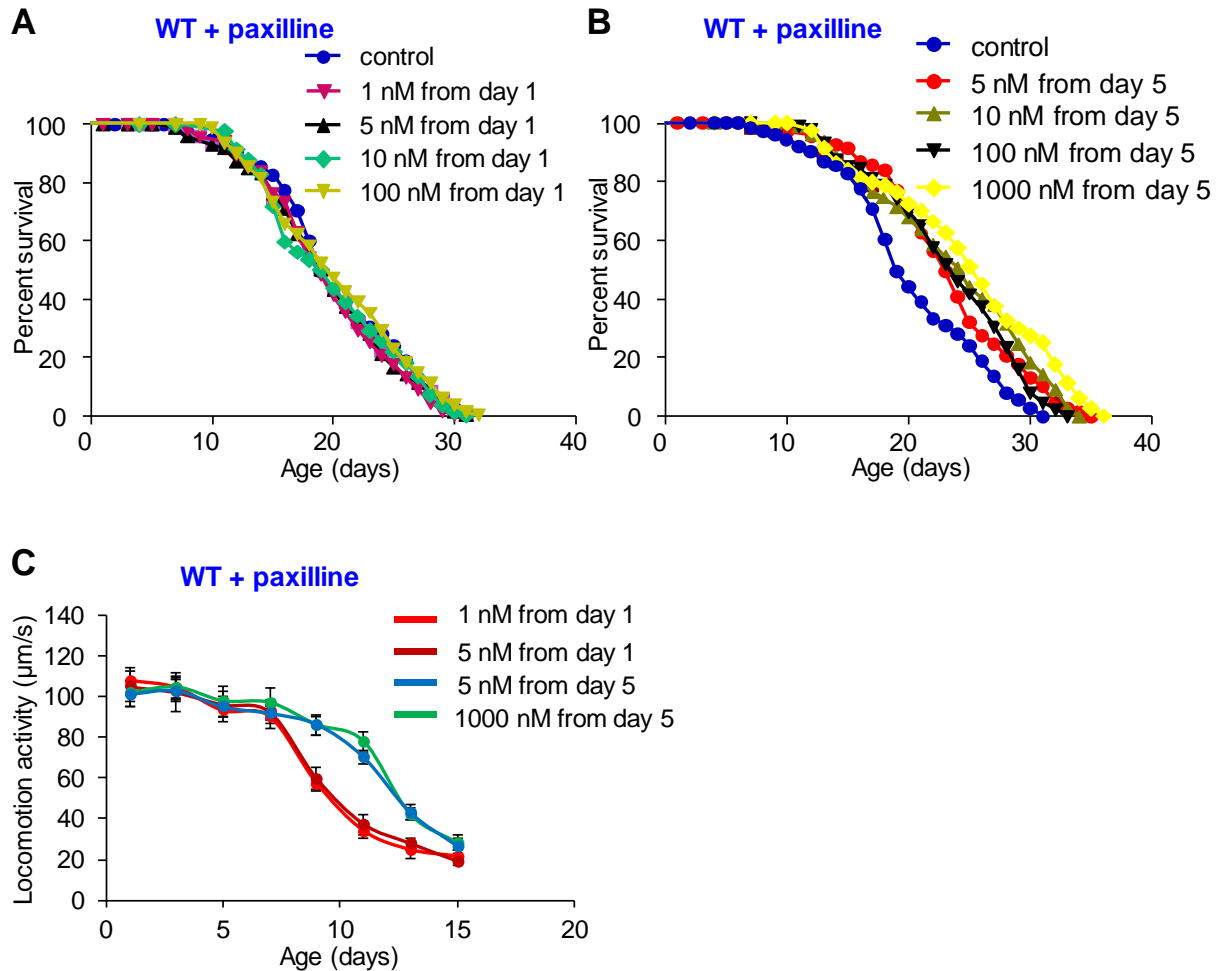

**Fig. S6. The effects of different concentrations of paxilline on life span and motor aging.** (A) paxilline, when applied to worms in early life (day 1), do not extend lifespan even at concentrations as low as 1 nM ( $p=0.664$ , Log Rank test). (B) paxilline, when applied to worms at a later age (day 5) can extend lifespan even at concentrations as high as 1000 nM ( $p<0.003$ , Log Rank test). (A) and (B) were performed at the same time and share the same control curve. (C) paxilline does not slow motor activity decline with age when applied to worms in early life (day 1) even at concentrations as low as 1 nM; by contrast, paxilline slows motor activity decline with age when applied to worms at a later age (day 5) even at concentrations as high as 1000 nM. Error bars: SEM.  $n\geq 20$ .

## Figure S7

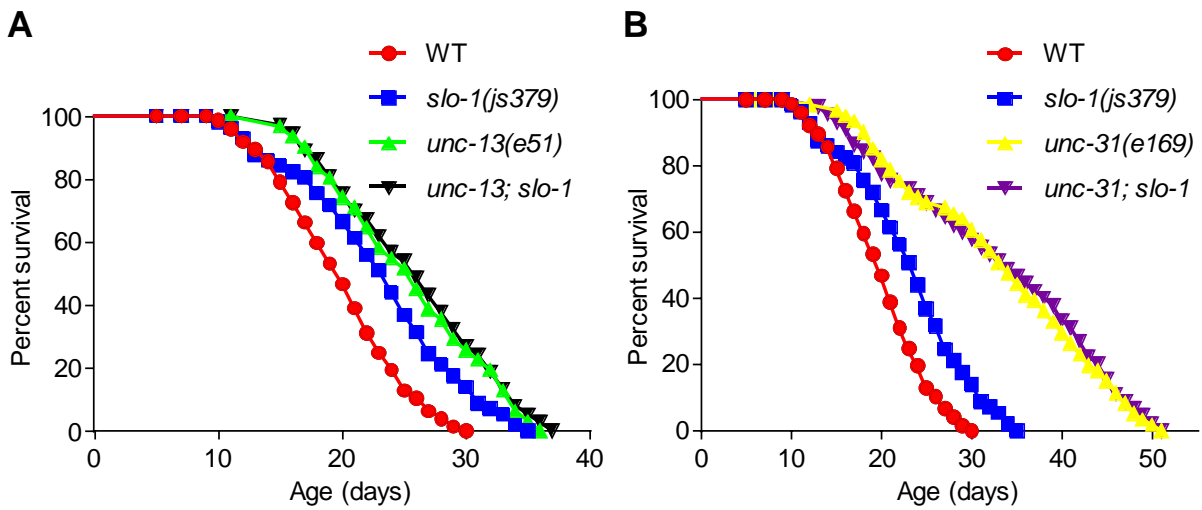

**Fig. S7. Loss of *slo-1* does not extend the life span of mutants defective in neurotransmission.** *slo-1* null mutation (*js379*) cannot further extend the lifespan of mutants defective in neurotransmission, such as *unc-13(e51)* (A) ( $p=0.712$ , Log Rank test), and *unc-31(e169)* mutants (B) ( $p=0.830$ , Log Rank test). WT and *slo-1* curves in (A) and (B) are identical and shown for convenience of comparison.



**Table S1. Summary of life-span data.**

| Strain                                     | Temp(°C) | Mean Lifespan (days) | SEM | SD  | Median Lifespan (days) | 75% Lifespan (days) | n (assay/ total) | P Value against | Figure |
|--------------------------------------------|----------|----------------------|-----|-----|------------------------|---------------------|------------------|-----------------|--------|
| N2                                         | 20       | 18.4                 | 0.6 | 5.4 | 19                     | 23                  | 72/112           | —               | 1C     |
| <i>slo-1(js379)</i>                        | 20       | 22                   | 0.6 | 5.1 | 22                     | 26                  | 58/80            | <0.005          | 1C     |
|                                            |          |                      |     |     |                        |                     |                  |                 |        |
| N2                                         | 20       | 20.5                 | 0.6 | 4.7 | 21                     | 24                  | 72/112           | —               | Exp.2  |
| <i>slo-1(js379)</i>                        | 20       | 23                   | 0.7 | 5.7 | 23                     | 27                  | 58/80            | <0.0005         | Exp.2  |
|                                            |          |                      |     |     |                        |                     |                  |                 |        |
| N2                                         | 20       | 18.9                 | 0.6 | 4.8 | 19                     | 23                  | 65/98            | —               | 2A     |
| <i>slo-1(js379)</i>                        | 20       | 22.6                 | 0.8 | 6.5 | 23                     | 28                  | 60/92            | <0.0001         | 2A     |
| <i>slo-1; Prgef-1::slo-1</i>               | 20       | 20                   | 0.7 | 5.6 | 20                     | 24                  | 62/90            | 0.1033          | 2A     |
| <i>slo-1; Pmyo-3::slo-1</i>                | 20       | 23.1                 | 0.6 | 5.2 | 24                     | 27                  | 87/110           | <0.005          | 2A     |
| <i>slo-1; Posm-6::slo-1</i>                | 20       | 22.7                 | 0.7 | 6.2 | 24                     | 27                  | 69/103           | <0.0001         | 2A     |
| <i>slo-1; Pacr-2::slo-1+Punc-25::slo-1</i> | 20       | 20.3                 | 0.3 | 5.1 | 20                     | 24                  | 60/104           | 0.1086          | 2A     |
|                                            |          |                      |     |     |                        |                     |                  |                 |        |
| N2                                         | 20       | 20.1                 | 0.7 | 5.7 | 20                     | 25                  | 67/99            | —               | Exp.2  |
| <i>slo-1(js379)</i>                        | 20       | 23.5                 | 0.9 | 6.8 | 24                     | 28                  | 63/97            | <0.005          | Exp.2  |
| <i>slo-1; Prgef-1::slo-1</i>               | 20       | 19.7                 | 0.9 | 5.7 | 20                     | 24                  | 61/93            | 0.812           | Exp.2  |
| <i>slo-1; Pmyo-3::slo-1</i>                | 20       | 22.5                 | 0.9 | 7.6 | 23                     | 28                  | 71/100           | <0.005          | Exp.2  |
| <i>slo-1; Posm-6::slo-1</i>                | 20       | 22.9                 | 0.8 | 6.6 | 24                     | 28                  | 64/98            | <0.005          | Exp.2  |
| <i>slo-1; Pacr-2::slo-1+Punc-25::slo-1</i> | 20       | 20.3                 | 0.6 | 4.3 | 21                     | 24                  | 88/101           | 0.978           | Exp.2  |
|                                            |          |                      |     |     |                        |                     |                  |                 |        |
| L4440 control                              | 20       | 15.7                 | 0.3 | 3.3 | 15                     | 18                  | 110/120          | —               | 3E     |
| <i>slo-1</i> RNAi from day 1               | 20       | 15.3                 | 0.4 | 3.7 | 15                     | 18                  | 68/88            | 0.5827          | 3E     |
| <i>slo-1</i> RNAi from day 3               | 20       | 15.9                 | 0.3 | 3.3 | 15                     | 18                  | 92/102           | 0.8497          | 3E     |
|                                            |          |                      |     |     |                        |                     |                  |                 |        |
| L4440 control                              | 20       | 15.7                 | 0.3 | 3.3 | 15                     | 18                  | 110/120          | —               | 3F     |

|                                                      |    |      |     |     |    |    |         |         |       |
|------------------------------------------------------|----|------|-----|-----|----|----|---------|---------|-------|
| <i>slo-1</i> RNAi from day 5                         | 20 | 18.5 | 0.4 | 4.0 | 19 | 21 | 88/108  | <0.0001 | 3F    |
| <i>slo-1</i> RNAi from day 7                         | 20 | 18.6 | 0.4 | 4.0 | 19 | 22 | 98/109  | <0.0001 | 3F    |
|                                                      |    |      |     |     |    |    |         |         |       |
| L4440 control                                        | 20 | 21.1 | 0.6 | 5.4 | 21 | 26 | 84/95   | —       | Exp.2 |
| <i>slo-1</i> RNAi from day 1                         | 20 | 21.1 | 0.5 | 7.3 | 21 | 27 | 106/116 | 0.3813  | Exp.2 |
| <i>slo-1</i> RNAi from day 3                         | 20 | 21.7 | 0.6 | 6.1 | 22 | 27 | 113/123 | 0.2368  | Exp.2 |
|                                                      |    |      |     |     |    |    |         |         |       |
| L4440 control                                        | 20 | 21.1 | 0.6 | 5.4 | 21 | 26 | 84/95   | —       | Exp.2 |
| <i>slo-1</i> RNAi from day 5                         | 20 | 23.1 | 0.7 | 6.9 | 23 | 30 | 106/117 | <0.05   | Exp.2 |
| <i>slo-1</i> RNAi from day 7                         | 20 | 23.2 | 0.7 | 6.9 | 23 | 29 | 97/110  | <0.005  | Exp.2 |
|                                                      |    |      |     |     |    |    |         |         |       |
| N2                                                   | 20 | 18.1 | 0.3 | 4.2 | 18 | 22 | 67/84   | —       | 4A,B  |
| <i>slo-1(js379)</i>                                  | 20 | 21.1 | 0.9 | 8.3 | 22 | 25 | 69/84   | <0.0001 | 4A,B  |
| <i>daf-16(mgDF47)</i>                                | 20 | 13.3 | 0.7 | 6.4 | 14 | 17 | 75/84   | <0.0001 | 4A,B  |
| <i>slo-1(js379); daf-16(mgDF47)</i>                  | 20 | 14   | 0.2 | 3.2 | 14 | 18 | 66/84   | <0.005  | 4A,B  |
| Pges-1::DAF-16; <i>slo-1(js379); daf-16(mgDF47)</i>  | 20 | 19.2 | 0.2 | 3.2 | 19 | 22 | 72/84   | 0.3433  | 4A,B  |
| Prgef-1::DAF-16; <i>slo-1(js379); daf-16(mgDF47)</i> | 20 | 22.1 | 0.3 | 4.1 | 22 | 26 | 71/84   | <0.005  | 4A,B  |
|                                                      |    |      |     |     |    |    |         |         |       |
| N2                                                   | 20 | 18.6 | 0.2 | 3.1 | 18 | 22 | 64/83   | —       | Exp.2 |
| <i>slo-1(js379)</i>                                  | 20 | 22.1 | 0.3 | 3.3 | 22 | 25 | 72/84   | <0.005  | Exp.2 |
| <i>daf-16(mgDF47)</i>                                | 20 | 13.2 | 0.2 | 3.3 | 13 | 18 | 75/84   | <0.005  | Exp.2 |
| <i>slo-1(js379); daf-16(mgDF47)</i>                  | 20 | 14.1 | 0.3 | 4.1 | 14 | 18 | 69/86   | <0.005  | Exp.2 |
| Pges-1::DAF-16; <i>slo-1(js379); daf-16(mgDF47)</i>  | 20 | 18   | 0.4 | 5.1 | 18 | 22 | 67/84   | 0.2236  | Exp.2 |
| Prgef-1::DAF-16; <i>slo-1(js379); daf-</i>           | 20 | 22.1 | 0.4 | 5.3 | 22 | 25 | 69/87   | <0.005  | Exp.2 |

|                                          |    |      |     |     |    |    |        |         |       |
|------------------------------------------|----|------|-----|-----|----|----|--------|---------|-------|
| <b>16(mgDF47)</b>                        |    |      |     |     |    |    |        |         |       |
|                                          |    |      |     |     |    |    |        |         |       |
| <b>Control</b>                           | 20 | 18.1 | 0.3 | 4.1 | 18 | 21 | 80/100 | —       | 5A    |
| <b>day 1 + Paxiline</b>                  | 20 | 18.4 | 0.3 | 3.6 | 18 | 21 | 82/100 | 0.2641  | 5A    |
| <b>day 3 + Paxiline</b>                  | 20 | 18.5 | 0.3 | 4.1 | 18 | 22 | 83/100 | 0.3754  | 5A    |
|                                          |    |      |     |     |    |    |        |         |       |
| <b>Control</b>                           | 20 | 18.4 | 0.1 | 1.7 | 18 | 21 | 79/100 | —       | 5B    |
| <b>day 5 + Paxiline</b>                  | 20 | 20.5 | 0.5 | 6.2 | 21 | 23 | 78/100 | <0.001  | 5B    |
| <b>day 7 + Paxiline</b>                  | 20 | 23.3 | 0.5 | 6.4 | 23 | 26 | 74/100 | <0.0001 | 5B    |
|                                          |    |      |     |     |    |    |        |         |       |
| <b>slo-1(js379)</b>                      | 20 | 22.1 | 0.3 | 4.2 | 22 | 25 | 82/100 | —       | 5C    |
| <b>slo-1(js379); day 5 + Paxiline</b>    | 20 | 22.2 | 0.4 | 3.7 | 22 | 25 | 80/100 | 0.2244  | 5C    |
| <b>slo-1(js379); day 7 + Paxiline</b>    | 20 | 21.1 | 0.4 | 4.1 | 21 | 24 | 77/101 | 0.3901  | 5C    |
|                                          |    |      |     |     |    |    |        |         |       |
| <b>daf-16 (mgDF47)</b>                   | 20 | 14.3 | 0.3 | 4.3 | 14 | 18 | 75/84  | —       |       |
| <b>daf-16 (mgDF47); day 5 + Paxiline</b> | 20 | 14.4 | 0.6 | 7.1 | 14 | 18 | 72/84  | 0.5542  |       |
| <b>daf-16 (mgDF47); day 7 + Paxiline</b> | 20 | 14.1 | 0.3 | 4.3 | 14 | 18 | 74/84  | 0.4371  |       |
|                                          |    |      |     |     |    |    |        |         |       |
| <b>Control</b>                           | 20 | 18.2 | 0.5 | 6.2 | 18 | 21 | 67/100 | —       | Exp.2 |
| <b>day 1 + Paxiline</b>                  | 20 | 17.6 | 0.7 | 7.4 | 18 | 21 | 66/100 | 0.4351  | Exp.2 |
| <b>day 3 + Paxiline</b>                  | 20 | 18.2 | 0.6 | 7.3 | 18 | 22 | 69/100 | 0.4455  | Exp.2 |
|                                          |    |      |     |     |    |    |        |         |       |
| <b>Control</b>                           | 20 | 18.3 | 0.4 | 5.2 | 18 | 21 | 70/100 | —       | Exp.2 |
| <b>day 5 + Paxiline</b>                  | 20 | 19.8 | 0.6 | 7.1 | 20 | 23 | 77/100 | <0.001  | Exp.2 |
| <b>day 7 + Paxiline</b>                  | 20 | 22.4 | 0.5 | 6.2 | 22 | 25 | 87/100 | <0.005  | Exp.2 |

|                                                                                                                                                                                                                                                                                                     |    |      |     |     |    |    |        |        |       |
|-----------------------------------------------------------------------------------------------------------------------------------------------------------------------------------------------------------------------------------------------------------------------------------------------------|----|------|-----|-----|----|----|--------|--------|-------|
| <i>slo-1(js379)</i>                                                                                                                                                                                                                                                                                 | 20 | 22.3 | 0.6 | 6.6 | 22 | 25 | 74/100 | —      | Exp.2 |
| <i>slo-1(js379);<br/>day 5 +<br/>Paxiline</i>                                                                                                                                                                                                                                                       | 20 | 22.4 | 0.5 | 6.3 | 22 | 25 | 71/100 | 0.5332 | Exp.2 |
| <i>slo-1(js379);<br/>day 7 +<br/>Paxiline</i>                                                                                                                                                                                                                                                       | 20 | 23.3 | 0.4 | 5.2 | 23 | 25 | 67/100 | 0.5134 | Exp.2 |
|                                                                                                                                                                                                                                                                                                     |    |      |     |     |    |    |        |        |       |
| <i>daf-16<br/>(mgDF47)</i>                                                                                                                                                                                                                                                                          | 20 | 14.2 | 0.4 | 4.7 | 14 | 18 | 76/84  | —      | Exp.2 |
| <i>daf-16<br/>(mgDF47);<br/>day 5 +<br/>Paxiline</i>                                                                                                                                                                                                                                                | 20 | 14.5 | 0.2 | 3.3 | 14 | 18 | 73/84  | 0.5001 | Exp.2 |
| <i>daf-16<br/>(mgDF47);<br/>day 7 +<br/>Paxiline</i>                                                                                                                                                                                                                                                | 20 | 14.2 | 0.2 | 3.3 | 14 | 18 | 74/84  | 0.6054 | Exp.2 |
| <p><b>Note:</b> two sets of lifespan data are listed for each experiment. The first set is graphed in the figures. The second set (replicates) is shown here as “Exp. 2”. Figure 3E and Fig. 3F share the same control curve. The Log Rank (Mantel-Cox) test was used for statistical analysis.</p> |    |      |     |     |    |    |        |        |       |
